1           **Nurse-Led Telerehabilitation Intervention to Improve Stroke Efficacy:**  
2                               **Protocol for a pilot randomized feasibility trial**

3           Stephanopoulos Kofi Junior Osei<sup>1</sup>, Emanuella Adomako – Bempah<sup>2</sup>, Adelaide Appiah  
4                               Yeboah<sup>3</sup>, Lawrence Akuamoah Owiredu<sup>2</sup> and Lillian Akorfa Ohene<sup>1</sup>

5           <sup>1</sup>School of Nursing & Midwifery, University of Ghana, Accra Ghana

6           <sup>2</sup>37 Military Hospital, Accra Ghana

7           <sup>3</sup>University of Ghana Hospital, Accra Ghana

8           **Correspondence:** Stephanopoulos Kofi Junior Osei

9           Email: [skjosei@st.ug.edu.gh](mailto:skjosei@st.ug.edu.gh)

10          Protocol Date: 18<sup>th</sup> November, 2022

11          Protocol Version: 1.0

12          **Trial Registration:** PACTR202210685104862, Pan African Clinical Trial Registry

13          **Abstract**

14          **Background:** The prevalence of stroke continues to rise in low-middle income  
15          countries. The continual rise in stroke cases and increasing prevalence on post-acute  
16          needs represent a crucial call for increased accessibility and utilization of rehabilitation  
17          services.

18          **Aim:** The primary objective of the study is to test the feasibility (recruitment, retention  
19          rates, cost and participant satisfaction) of a nurse-led telerehabilitation intervention in

20 improving self-efficacy among stroke survivors. The findings of the trial are intended for  
21 use in a future larger study.

22 **Methods:** Participants would be recruited at the University of Ghana Hospital and  
23 randomized into an intervention group and a control group after being stratified based  
24 on age and type of stroke. Participants aged  $\geq 18$  years, diagnosed stroke at most  
25 12months prior the recruitment and requiring moderate level of assistance would be  
26 considered for eligibility. Participants in the intervention group would undergo initial and  
27 continuous assessments for identification of problems and needs. Based on individual  
28 needs, participants would receive various nursing rehabilitation therapies in appropriate  
29 domains (cognitive, physical, emotional, and nursing education) combined with  
30 treatment as usual for 6 months. Participants in the controlled group would only receive  
31 treatment as usual (physiotherapy and follow-up with a medical officer). A follow-up  
32 evaluation would be conducted immediately, 30 days and 90 days after the intervention.

33 **Discussion:** Providing stroke rehabilitation services in low-resource settings presents  
34 a significant challenge due to limited infrastructure and a lack of trained healthcare  
35 professionals. The current study has the potential of contributing to the growing body of  
36 evidence on the impact of telerehabilitation services in mitigating these challenges in  
37 low-resource settings.

38 Keywords: stroke, telerehabilitation, stroke nursing, telenursing

### 39 **Abbreviations**

40 IRB – Institutional Review Board

41 LMICs – Low and Middle Income Setting

42 PC – Personal Computer

43 TAU – Treatment

44 WHO – World Health Organization

## 45 **Introduction**

46 In low- and middle-income settings, stroke remains one of the major causes of disability  
47 and mortality [1-3]. Patients who suffer a stroke may experience variable degrees of  
48 impairment and, in more serious situations, death. The aftermath of a stroke depends on  
49 several factors, including patient characteristics, emergency health-seeking behaviour,  
50 the nature of the stroke, and post-stroke sequelae [4-6]. It is crucial for stroke survivors  
51 with impairments to undergo rehabilitation as part of the recovery process [7].

52 According to Knect et al. [8], rehabilitation after stroke plays a critical role in improving  
53 functional outcomes, and mainly targets the recovery of motor and cognitive functions.  
54 Other studies have shown that providing emotional and psychological support for the  
55 patient and their caregivers during the rehabilitation process can greatly contribute to  
56 overall success [9,10].

57 Traditionally, stroke rehabilitation begins after the patient has been physiologically  
58 stabilized and is still on hospital admission [11]. This initial rehabilitation phase is  
59 primarily focused on improving physical functioning and facilitating the patient's  
60 transition back to their home. This is followed by continuous rehabilitation, which  
61 typically takes place between 8 weeks and 6 months after the onset of the stroke. During

62 continuous rehabilitation, patients make practical adjustments in their homes and try to  
63 navigate their natural environment with minimal assistance [12].

64 Despite the enormous impact of rehabilitation on recovery and life adjustment post-  
65 stroke, the delivery of equitable and affordable access to rehabilitation remains a  
66 challenge globally [13]. This challenge is more prominent in LMICs due to limited  
67 rehabilitation infrastructure and inadequate number of trained health workers.<sup>14</sup> In  
68 Ghana, access to rehabilitation especially during the continued phase and post-hospital  
69 discharge is met with major challenges, including the high cost of available services,  
70 limited dedicated stroke rehabilitation services and units, socio-cultural barriers, long  
71 waiting times, poor education on rehabilitation and poor communication with healthcare  
72 providers [14,15]. As a result, persons recovering from stroke may have several unmet  
73 rehabilitative needs which remains unresolved, and adversely impact the recovery  
74 process [14].

75 These challenges exist partly due to the nature of conventional stroke rehabilitation  
76 during the continuous phase. Patients who are undergoing post-discharge rehabilitation  
77 mostly have to present themselves at the health facility, receive planned therapy and  
78 travel back to their homes [15]. This approach however is wrought with issues such as  
79 long travel distances and financial burden which often deter the stroke survivors from  
80 returning to use available services in any. During the COVID-19 pandemic, such travels  
81 were virtually impossible in some settings creating a greater need to consider other  
82 innovative measures of continuing rehabilitative support even at a distance [16].

83 Telerehabilitation is becoming a highly considered approach to delivering stroke  
84 rehabilitation services. The approach has yielded positive outcomes, including improved

85 stroke self-efficacy, motor functioning, and emotional well-being [17-19].

86 Telerehabilitation is projected to be a tremendous solution to the current challenges  
87 associated with rehabilitation accessibility. Additionally, stroke telerehabilitation has  
88 been found to be feasible and has received high acceptability among both patients and  
89 health workers in different countries, including Ghana [20,21].

90 With a limited number of stroke specialists in the country, stroke and community nurses  
91 in Ghana have to take a prominent role in supporting stroke rehabilitation [22]. As  
92 indicated earlier, the disabling effects of stroke put patients in a critical situation for  
93 increased rehabilitation support. Nurses are uniquely placed to support these patients  
94 after discharge. According to Kirvevold [12] nurses' roles in post-discharge stroke  
95 rehabilitation includes but are not limited to coordinating treatment and care, providing  
96 assistance to survivors and family, providing informational support, consolation,  
97 monitoring condition progress, and supporting the resumption of roles and  
98 activities. These are all major roles that are crucial for improving patient outcomes and  
99 meeting the rehabilitation needs of stroke survivors and caregivers [23]. However,  
100 similar to conventional stroke rehabilitation, nurses' involvement in stroke  
101 telerehabilitation is limited, particularly in LMICs [24]. Essentially, post-discharge stroke  
102 rehabilitation aligns with the mandate of nursing to promote recovery which places  
103 nurses at the core of the process. Despite this assertion, the critical role of nurses in post-  
104 discharge stroke rehabilitation especially in LMICs has not been well articulated in  
105 existing literature.

106 It is against this background that an innovative programme of care was developed. The  
107 current study seeks to assess the effects of a nurse-led stroke telerehabilitation

108 intervention that facilitates the delivery of comprehensive nursing care to stroke  
109 survivors and caregivers in Ghana. The focus is to unearth the potential of  
110 telerehabilitation nursing in mitigating the numerous challenges affecting patients  
111 seeking stroke rehabilitation.

112 The study objective is to assess the preliminary feasibility and user satisfaction of a  
113 nurse-led holistic telerehabilitation among Ghanaian stroke survivors. The primary  
114 objectives of the trial are as follows:

- 115 1. Assess the retention of participants by estimating 1 month and 3-months follow-  
116 up rates
- 117 2. Assess the acceptability of nurse-led telerehabilitation intervention in terms of  
118 participant satisfaction
- 119 3. Examine participant experiences of nurse-led telerehabilitation intervention

120 A secondary objective of the trial is to measure whether a nurse-led telerehabilitation  
121 would improve self-efficacy of stroke survivors.

## 122 **Methods and analysis**

### 123 **Study design**

124 The trial is a parallel-group (intervention and control groups) randomized controlled  
125 study with 1:1 allocation to assess feasibility of a nurse-led telerehabilitation intervention  
126 administered remotely at the homes of Ghanaian stroke survivors. Post intervention

127 process evaluation will employ a mixed method approach to exploring feasibility elements  
128 of the intervention.

## 129 **Study setting**

130 Study participants would be recruited from the University of Ghana Hospital in Accra,  
131 Ghana. The facility has a dedicated stroke outpatient clinic for clients and a physiotherapy  
132 unit. We have already engaged with the chief nurse officer, lead physiotherapist, and head  
133 of the stroke clinic of the hospital, who are key to the success of the participant  
134 recruitment process.

## 135 **Eligibility criteria**

136 Study participants will be considered for inclusion if they meet the following criteria:(1)  
137 is 18 years or above (2) diagnosed of a stroke with an onset of 1 week to 12 months prior  
138 the intervention (3) has FIM score of 55-100 (Level 3 moderate assistance) (4) total  
139 NIHSS score of 5 - 15 (moderate stroke). However, study participants would be excluded  
140 subject to these criteria: (1) has no access to a smartphone (2) is unavailable for follow-  
141 up interviews (3) has a cognitive impairment (as documented in the patient's medical  
142 records) that makes it difficult to comprehend the information provided and limits  
143 capacity to provide consent.

## 144 **Recruitment and screening**

145 Participants would be recruited from the medical department and the stroke clinic of the  
146 University of Ghana Hospital. Patients at the study setting would be approached onsite  
147 and provided comprehensive background information about the study, including its risks

148 and benefits during first encounter as part of inviting them to consider participating. If  
149 they opt to participate, eligibility clinical screening based on aforementioned criteria will  
150 be completed by the recruiting nurse.  
151 In this regard, the nurse will complete the FIM and NIHSS scores to ascertain eligibility.  
152 Informed consent would be obtained by researchers at this point (Fig 1). This informed  
153 consent has been approved by the Noguchi Institutional Review Board 032/21-22.

154 Fig 1. Enrolment, interventions and assessment schedule

## 155 **Intervention**

156 Eligible participants would randomly be assigned to either the treatment or control group.  
157 Participants in control group would receive treatment as usual (TAU) which comprise of  
158 two weekly physiotherapy sessions and two sessions with a medical doctor.

159 Participants in the intervention group would receive comprehensive nursing  
160 neurorehabilitation support in addition to existing service at the hospital. The  
161 components of the intervention are guided by relevant literature, established guidelines  
162 [25-27] and have been reviewed by a panel of experts including two neuroscience nurses,  
163 two community health nurses, three neurologists, one stroke specialist, one  
164 physiotherapist and a stroke survivor. Patients would undergo assessment and receive  
165 various therapies in appropriate domains for 6months. A follow-up evaluation would be  
166 performed at the end, 30- and 90-days after the intervention (Fig. 2). The intervention  
167 would involve the following components;

168 Fig 2. Workflow



## 169 **Initial and ongoing patient assessment**

170 Participants would undergo various assessments on motor function, cognitive capacity,  
171 anxiety and depressive levels and nutritional status utilizing evidenced-based assessment  
172 tools. The initial assessment would span in the first week of the intervention. Based on  
173 the problems and needs identified during the assessment, participants would receive a  
174 bundle of interventions in the domains of cognitive rehabilitation, physical rehabilitation,  
175 emotional support, and stroke education. These interventions would be provided twice a  
176 week in 1hr-to-1hr 30mins per session via video chats on WhatsApp. A participant in the  
177 intervention may have 192 sessions maximum or 48 sessions minimum in the span of the  
178 intervention.

## 179 **Cognitive rehabilitation domain**

180 This domain is mainly focuses on supporting participants to establish a daily routine,  
181 improving memory and attention and mitigating spatial neglect [28]. We would guide  
182 participants in clearly structuring their daily activities based on their preferences and  
183 setting priorities [9]. Participants also be guided in visual scanning activities, attention  
184 training exercises and utilizing memory aids [29].

## 185 **Physical rehabilitation domain**

186 The aim of physical rehabilitation will be the recovery of the patient's motor functioning  
187 impacted by stroke [8]. Participants would undergo stroke-specific impairment  
188 assessment using the Fugl-Meyer Assessment (FMA) [30]. Based on identified needs the  
189 participant would undergo graded physical therapy including passive and activities  
190 range of motion exercises, constraint-induced exercises, and stress ball usage.

191 Additionally, participants and their caregivers would be educated on proper use of  
192 assistive devices for gait and mobility training.

### 193 **Emotional support**

194 This domain is geared towards assessing and supporting the emotional status of  
195 participants and their caregivers. We would provide counselling sessions to help identify  
196 the extent of loss which greatly influences the emotional status and recovery of  
197 participants [31]. Additionally, study participants would be guided in recognizing their  
198 own emotions and identifying personalized but effective coping strategies [9].

### 199 **Stroke education**

200 Education would be provided for participants and their relatives. The target of the  
201 information provided would focus on improving the participant's understanding of the  
202 disease condition, modifiable risk factors of recurrence, pain management, preventing  
203 pressure ulcers, oral and catheter care, continence management, the importance of  
204 following professional dietary recommendations, and healthy nutrition in the recovery  
205 process [32].

206 See (Table 1) for details regarding the intervention presented based on the TiDieR  
207 checklist.

208 Table 1: Details of Intervention

| <b>Component of the intervention</b> | What (procedures)                                          | Who                                    | How (mode of delivery)   | Where (location of intervention) | When (schedule), How much, dose, intensity           | Tailoring                           |
|--------------------------------------|------------------------------------------------------------|----------------------------------------|--------------------------|----------------------------------|------------------------------------------------------|-------------------------------------|
| Initial assessment                   | Comprehensive baseline patient assessment of the status of | Stroke nurses, and physiotherapist and | Via video call and on an | Patient's home                   | Only once as this serves as the baseline assessment. | All participants would undergo this |

|                                 |                                                                                                                                                                                                                                      |                                   |                                        |                 |                                                                                                                                                                                                            |                                                                                                                                              |
|---------------------------------|--------------------------------------------------------------------------------------------------------------------------------------------------------------------------------------------------------------------------------------|-----------------------------------|----------------------------------------|-----------------|------------------------------------------------------------------------------------------------------------------------------------------------------------------------------------------------------------|----------------------------------------------------------------------------------------------------------------------------------------------|
|                                 | participants motor function, cognitive capacity, levels of anxiety and depression for the purpose of identification of participant needs                                                                                             | neuropsychologist as consultants. | individual basis                       |                 |                                                                                                                                                                                                            | initial assessment for identification problem.                                                                                               |
| Ongoing assessment              | Comprehensive ongoing patient assessment of the status of participants motor function, cognitive capacity, levels of anxiety and depression for the purpose of identifying patients progress and ascertaining possible deterioration | Stroke nurses                     | Via video call and on individual bases | Patient's home  | Ongoing assessment would be provided as needed to fit participant needs changes and identifying progress                                                                                                   | Ongoing assessment is participant specific and may not occur at similar frequency from one participant to the other                          |
| Cognitive rehabilitation domain | This domain focuses on guiding patients to establish a structured routine for every day, attention training exercises and learning the proper use of memory aids                                                                     | Stroke nurses                     | Via video call and on individual bases | Patient's homes | Cognitive sessions would be held any other week participants with reported cognitive deficits that affect ADLs. Essentially, this group of participants would have 12 sessions on cognitive rehabilitation | Based on cognitive needs participants may be guided in using different strategies for either improving memory, or mitigating spatial neglect |
| Physical rehabilitation domain  | Participants would undergo passive and/or active range of motion exercises, constraint-induced therapy and stress-ball                                                                                                               | Stroke nurses, physiotherapist    | Via video call and on individual bases | Patient's homes | Physical rehabilitations sessions would be held twice a week for participants with reported functional deficits that                                                                                       | Physical domains sessions are tailored to the functional needs of participants. Participants would be                                        |

|                          |                                                                                                                                                                                                                   |               |                                                           |                 |                                                                                                                       |                                                                                                                                               |
|--------------------------|-------------------------------------------------------------------------------------------------------------------------------------------------------------------------------------------------------------------|---------------|-----------------------------------------------------------|-----------------|-----------------------------------------------------------------------------------------------------------------------|-----------------------------------------------------------------------------------------------------------------------------------------------|
|                          | usage. Education on proper usage of assistive devices would also be provided                                                                                                                                      |               |                                                           |                 | affect ADLs. Essentially, this group of participants would have 48 sessions on physical rehabilitation rehabilitation | grouped into those who can walk and stand with aids, those who cannot walk but stand with some gait issues and those who cannot stand at all. |
| Emotional support domain | Sessions would focus on understanding the extent of loss, recognizing emotions and mood changes and identifying personalised coping strategies for negative anxiety and depressive feelings that affect recovery. | Stroke nurses | Via video call and on individual bases                    | Patient's homes | Emotional support sessions would be held biweekly. Participants would have 12 sessions of emotional support.          | Participants would have to the opportunity to identify individual coping strategies.                                                          |
| Stroke education domain  | These sessions presents topics related to stroke as a conditions, modifiable risk factors, pain management, pressure ulcer prevention, nutrition and continence.                                                  | Stroke nurses | Via video call and on individual bases and group sessions | Patient's homes | These sessions would be held every three weeks during the intervention period.                                        | Certain topics would be discussed during individual session to meet personal needs.                                                           |

209

## 210 **Outcomes and outcome measures**

### 211 **Primary outcomes**

212 Based on the CONSORT checklist [33] the pilot study is primarily aimed at assessing the

213 preliminary feasibility and acceptability of the intervention in the Ghanaian context.

214 *Feasibility:* Feasibility would be measured by retention rate, rate of adverse events and  
215 recording the details of resources used in implementing the intervention. Additionally,  
216 duration of sessions and cost of internet for the research team and study participants  
217 would be captured.

218 *Participant satisfaction:* This will include the use of a 12-item questionnaire to assess  
219 the level of satisfaction of participants on delivery of the intervention, time spent, quality  
220 of audio-visual channels involved and overall perceived benefits [34].

221 *Participant experiences:* Qualitative data of participant experiences would be captured in  
222 order to provide in-depth explanation of satisfaction levels. This would be guided by an  
223 interview probe designed for purpose.

## 224 **Secondary outcome**

225 *Self-efficacy:* The secondary and clinical outcome in focus would be Stroke Self-efficacy.  
226 The goal is assessed potential effectiveness of the intervention in improving self-efficacy  
227 among patients. This would be measured the Stroke Self Efficacy Questionnaire (SSEQ).  
228 The SSEQ is a 13-item scalar questionnaire that measures the stroke survivor's ability and  
229 confidence in performing tasks under self-care, mobility and effective coping. The scale is  
230 also vital for assessing the functional performance of the study participants after the  
231 intervention [35,36]. This tool is most appropriate because it has been proven to have  
232 good face validity with a Cronbach Alpha of 0.90 suggesting good internal consistency  
233 and higher criterion validity when compared with other self-efficacy scales [37].

## 234 **Proposed sample size**

235 We aim at recruiting 20 participants per group (total = 40 participants). The size however  
236 is guided by Julious' rule of thumb for 12 participants per group in pilot trial [38]. The  
237 potential attrition rate estimated is 20% per group. During the follow-up phase,  
238 qualitative data on participant experiences would be captured from 15 conveniently  
239 sampled participants from the intervention group.

## 240 **Randomization, allocation and blinding**

241 After eligible participants have provided informed consent and undergone baseline  
242 screening, they would be randomly assigned to the intervention group (Nurse-led  
243 rehabilitation support + Treatment as usual) and control group (only treatment as usual).  
244 A concealed block randomization (1:1) would be conducted by an independent researcher  
245 breaking sequentially numbered opaque envelopes, prepared by the said independent  
246 researcher using a random number generator [39]. Both participants and interventionists  
247 (nurses, physiotherapists, and neuropsychologists) would be unmasked during the study.

## 248 **Data collection, entry and management**

249 Data would be gathered from participants before the intervention but after recruitment  
250 and after the intervention. Baseline data on patient history, socio-demographic  
251 characteristics, stroke self-efficacy levels, functional status, psychological function and  
252 cognitive capacity would be gathered from participants in both the intervention and  
253 control group. The second phase of data collection would take place immediately after  
254 the intervention capturing quantitative data on user satisfaction, qualitative data on  
255 experiences throughout the intervention only for participants in the intervention group

256 and stroke-self efficacy levels for participants in both group. The third and final phase of  
257 data collection would be executed 4 weeks and 12 weeks after the intervention respectively  
258 capturing stroke efficacy levels in both groups. The data collection process would be  
259 undertaken by the investigators. After completing each phase of data collection, the  
260 quantitative data would be entered into a spreadsheet using Microsoft Excel. The data  
261 would be processed for outliers and missing inputs. Qualitative interviews would be  
262 audiotaped, audios would be saved in a PC folder and later transcribed for analysis. The  
263 entered information and saved audios would be protected by a password only accessible  
264 by the research team.

## 265 **Data analysis**

266 Quantitative data analysis would be conducted using SPSS v26. The socio-demographic  
267 characteristics of participants would be summarized in frequencies and percentages.  
268 Continuous data gathered would be scrutinized for normality and necessary  
269 transformation would be applied if needed. Continuous variables would be summarized  
270 using means and SD. Mann-Whitney test or its parametric equivalent (if possible) would  
271 be employed to analyses the difference stroke self-efficacy levels in both groups at same  
272 points of follow-up evaluation. A repeated-measure analysis would be employed to  
273 ascertain changes in stroke self-efficacy level over the time. Results would be classified as  
274 significant if  $p < 0.05$  (two-tailed). All qualitative transcripts exported to NVivo version 10  
275 would be analyzed by reading that data line by line and making noting down insights as  
276 meaning units while the reading is ongoing. The meaning units would be labeled with a  
277 code, this would be done repeatedly to capture all aspects of the content (data). The codes

278 would then be categorized into sub-categories and broader categories for identification of  
279 themes [40].

## 280 **Possible risks and mitigation**

281 There are minimal perceived risks to study participants involved in the intervention.  
282 However, all participants would undergo periodic risk assessments at their homes by the  
283 research investigators. Additionally, participants and their caregivers would be provided  
284 emergency dial lines and the contacts of the researchers in case of an adversity. All adverse  
285 events related to the intervention would be well-documented, reported to clinicians in  
286 charge and reviewed. Additionally, the research team has liaised with community health  
287 nurses to provide assessment and further recommendation for patients in their homes.

## 288 **Ethics and dissemination**

289 The current study is targeted at determining the feasibility of a nurse-led  
290 telerehabilitation intervention for stroke patients in a low-resource setting. The study will  
291 illuminate the level of feasibility and effectiveness of this approach in settings similar to  
292 Ghana. Additionally, the study is crucial in further development and designing for similar  
293 interventions aimed at increasing accessibility to stroke rehabilitation using  
294 digitalisation. The study has ethical clearance from the Noguchi Memorial Institute of  
295 Research – IRB. Additionally, the trial has been registered in a public domain  
296 (PACTR202210685104862, Pan African Clinical Trial Registry). In the case of protocol  
297 modifications, both the IRB and trial registry would be informed using appropriate  
298 channels.



299 The findings of the study would be disseminated through peer-reviewed journals, nursing  
300 online and offline communities and conferences. Various key stakeholders including the  
301 Noguchi Memorial Institute of Research, the Ministry of Health Ghana and the University  
302 of Ghana Hospital (Legon) would be provided feedback and possibly recommendations  
303 based on the findings associated with the proposed study. Dataset at individual  
304 participant-level will not be shared indiscriminately. It would be made available on  
305 reasonable request.

## 306 **Discussion**

307 Accessibility to stroke rehabilitation in low-resource settings remains a prevalent  
308 challenge due to limited infrastructure and inadequately trained healthcare professionals  
309 [13,14]. In Ghana, the challenges are exacerbated especially after hospital discharge by  
310 barriers including limited communication from health workers, socio-cultural barriers,  
311 inadequate rehabilitation education, high cost of available services and long waiting  
312 times.<sup>15</sup>

313 There is evidence that nurses – the largest health professional group in Ghana, are  
314 uniquely placed to support rehabilitation services and increase accessibility [12].

315 The current study is deemed to reveal the effects of a nurse-led telerehabilitation  
316 intervention on improving the self-efficacy of stroke survivors in a low-resource setting.  
317 The intervention is holistic and draws underpinning insights from relevant literature, a  
318 multidisciplinary team and patients.

319 Although the approach is therapy-based, the primary goal is to offer individualized and  
320 family-centred rehabilitation support coordinated by nurses. Langhorne, Bernhardt &  
321 Kwakkel<sup>40</sup> asserts that multidisciplinary involvement, individualizing rehabilitation  
322 intervention and increasing intensity is crucial to the improvement of patient outcomes.

323 The study would also shed light on the feasibility of this emerging approach in delivering  
324 stroke rehabilitation services in a low-resource setting like Ghana. Additionally, the study  
325 would contribute to the existing literature on the potential impact of telehealth on  
326 healthcare delivery services in Ghana and other LMICs [41].

## 327 **Limitations**

328 The study is being conducted on a feasibility scale and involves a small size which may  
329 not be sufficient to detect significant differences between study groups albeit the findings  
330 can offer useful insight into telerehabilitation services for stroke survivors. Additionally,  
331 the limited follow-up periods of the study limit the ability to explore long-term effects of  
332 the intervention.

## 333 **Conclusion**

334 The implementation of a nurse-led telerehabilitation intervention for stroke survivors  
335 offers a potential contribution to mitigating the major challenges that threaten the  
336 accessibility of stroke rehabilitation services after acute management and post-hospital  
337 discharge.

## 338 **Author contributions**

339 SKJO was responsible for formulating the idea of the study. SKJO, LAO (1), EAB and AAY  
340 were responsible for the literature review, identifying research gaps and the construction  
341 of the components of the study intervention. SKJO and AAY were responsible for the  
342 study design. LAO(2) was responsible for manuscript review and coordinating the study  
343 with SKJO.

## 344 **Acknowledgements**

345 The authors would like to acknowledge the immense support offered by Miriam Iddrisu,  
346 Joyce Pwavra and Samuel Adjorlolo (PhD) all of the University of Ghana School of  
347 nursing and midwifery. We are also grateful to Dr Ram Hariharan, Dr Siva Nair, Nurse  
348 Hellen Oteng and Jonathan Bayuo (PhD) for their brilliant comments on this manuscript.

## 349 **Conflict of interest**

350 The authors declare no conflict of interest

## 351 **Funding**

352 This study was made possible by a grant from the World Innovation Summit for Health  
353 (WISH) a member of the Qatar Foundation. The funding body did not contribute the  
354 study design.

## 355 **References**

- 356 1. Katan M, Luft A. Global Burden of Stroke. *Seminars in Neurology*.  
357 2018;38(2):208-211. doi:10.1055/s-0038-1649503
- 358 2. Nkusi AE, Muneza S, Nshuti S, Hakizimana D, Munyemana P, Nkeshimana M,  
359 Rudakemwa E, Amendezo E. Stroke Burden in Rwanda: A Multicenter Study of  
360 Stroke Management and Outcome. *World Neurosurgery*. 2017;106:462-469.  
361 doi:10.1016/j.wneu.2017.06.163
- 362 3. Gould A, Asare H, Akpalu A, Cullen L, Easton S, Jarrett D, Johnson L, Kirk H,  
363 Spice C, Williams J. Development of Stroke Care in Ghana. *International*  
364 *Journal of Stroke*. 2011;6(2):150-151. doi:10.1111/j.1747-4949.2010.00571.x
- 365 4. Bustamante A, García-Berrocso T, Rodriguez N, Llombart V, Ribó M, Molina C,  
366 Montaner J. Ischemic stroke outcome: A review of the influence of post-stroke  
367 complications within the different scenarios of stroke care. *European Journal of*  
368 *Internal Medicine*. 2016;29:9-21. doi:10.1016/j.ejim.2015.11.030
- 369 5. Rodríguez-Castro E, López-Dequit I, Santamaría-Cadavid M, Arias-Rivas S,  
370 Rodríguez-Yáñez M, Pumar JM, Hervella P, López-Arias E, Da Silva-Candal A,  
371 Estany A, Piñeiro-Lamas M, Sobrino T, Campos F, Portela M, Vázquez-Lima M,  
372 Castillo J, Iglesias-Rey R. Trends in stroke outcomes in the last ten years in a  
373 European tertiary hospital. *BMC Neurology*. 2018;18(1). doi:10.1186/s12883-  
374 018-1164-7
- 375 6. Akpalu J, Yawson AE, Osei-Poku F, Atiase Y, Yorke E, Adjei P, Nkromah K,  
376 Akpalu A. Stroke Outcome and Determinants among Patients with and without

- 377 Diabetes in a Tertiary Hospital in Ghana. *Stroke Research and Treatment*.  
378 2018;2018:1-9. doi:10.1155/2018/7521351
- 379 7. Whitehead S, Baalbergen E. Post-stroke rehabilitation. *South African Medical*  
380 *Journal*. 2019;109(2):81. doi:10.7196/samj.2019.v109i2.00011
- 381 8. Knecht S, Hesse S, Oster P. Rehabilitation After Stroke. *Deutsches Ärzteblatt*  
382 *international*. 2011. doi:10.3238/arztebl.2011.0600
- 383 9. Beare B, Doogan CE, Douglass-Kirk P, Leff AP, Ward N. Neuro-Rehabilitation  
384 OnLine (N-ROL): description and evaluation of a group-based telerehabilitation  
385 programme for acquired brain injury. *Journal of Neurology, Neurosurgery &*  
386 *Psychiatry*. 2021;92(12):1354-1355. doi:10.1136/jnnp-2021-326809
- 387 10. Lee Y, Nicholas ML, Connor LT. Identifying emotional contributors to  
388 participation post-stroke. *Topics in Stroke Rehabilitation*. 2021:1-13.  
389 doi:10.1080/10749357.2021.2008597
- 390 11. Belagaje, S. R. (2017). Stroke rehabilitation. *CONTINUUM: Lifelong Learning in*  
391 *Neurology*, 23(1), 238-253.
- 392 12. Kirkevold M. The Role of Nursing in the Rehabilitation of Stroke Survivors.  
393 *Advances in Nursing Science*. 2010;33(1). doi:10.1097/ans.obo13e3181cd837f
- 394 13. Owolabi M, Thrift A, Martins S et al. The state of stroke services across the globe:  
395 Report of World Stroke Organization–World Health Organization surveys.  
396 *International Journal of Stroke*. 2021;16(8):889-901.  
397 doi:10.1177/17474930211019568
- 398 14. Bernhardt J, Urimubenshi G, Gandhi DBC, Eng JJ. Stroke rehabilitation in low-  
399 income and middle-income countries: a call to action. *The Lancet*.  
400 2020;396(10260):1452-1462. doi:10.1016/s0140-6736(20)31313-1

- 401 15. Baatiema L, Sanuade O, Kuumuori Ganle J, Sumah A, Baatiema L, Sumankuuro  
402 J. An ecological approach to understanding stroke experience and access to  
403 rehabilitation services in Ghana: A cross-sectional study. *Health & Social Care in*  
404 *the Community*. 2020;29(5). doi:10.1111/hsc.13243
- 405 16. Barbieri DM, Lou B, Passavanti M, Hui C, Lessa DA, Maharaj B, Banerjee A, Wang  
406 F, Chang K, Naik B, Yu L, Liu Z, Sikka G, Tucker A, Foroutan Mirhosseini A, Naseri  
407 S, Qiao Y, Gupta A, Abbas M, Fang K, Ghasemi N, Peprah P, Goswami S, Hessami  
408 A, Agarwal N, Lam L, Adomako S. A survey dataset to evaluate the changes in  
409 mobility and transportation due to COVID-19 travel restrictions in Australia,  
410 Brazil, China, Ghana, India, Iran, Italy, Norway, South Africa, United States. *Data*  
411 *in Brief*. 2020;33:106459. doi:10.1016/j.dib.2020.106459
- 412 17. Chumbler NR, Li X, Quigley P, Morey MC, Rose D, Griffiths P, Sanford J, Hoenig  
413 H. A randomized controlled trial on Stroke telerehabilitation: The effects on falls  
414 self-efficacy and satisfaction with care. *Journal of Telemedicine and Telecare*.  
415 2015;21(3):139-143. doi:10.1177/1357633x15571995
- 416 18. Chumbler NR, Quigley P, Li X, Morey M, Rose D, Sanford J, Griffiths P, Hoenig  
417 H. Effects of Telerehabilitation on Physical Function and Disability for Stroke  
418 Patients. *Stroke*. 2012;43(8):2168-2174. doi:10.1161/strokeaha.111.646943
- 419 19. Sarfo FS, Ulasavets U, Opare-Sem OK, Ovbiagele B. Tele-Rehabilitation after  
420 Stroke: An Updated Systematic Review of the Literature. *Journal of Stroke and*  
421 *Cerebrovascular Diseases*. 2018;27(9):2306-2318.  
422 doi:10.1016/j.jstrokecerebrovasdis.2018.05.013
- 423 20. Amuasi J, Agbogbaley MK, Sarfo FS, Beyuo A, Duah K, Agasiya P, Arthur A,  
424 Appiah L, Nguah SB, Bockarie A, Ayisi-Boateng NK, Boateng KGA, Adusei-

- 425 Mensah N, Akpalu A, Ovbiagele B. Feasibility, acceptability, and appropriateness  
426 of a mobile health stroke intervention among Ghanaian health workers. *Journal*  
427 *of the Neurological Sciences*. 2022;439:120304. doi:10.1016/j.jns.2022.120304
- 428 21. Sarfo F, Adamu S, Awuah D, Sarfo-Kantanka O, Ovbiagele B. Potential role of  
429 tele-rehabilitation to address barriers to implementation of physical therapy  
430 among West African stroke survivors: A cross-sectional survey. *J Neurol Sci*.  
431 2017;381:203-208. doi:10.1016/j.jns.2017.08.3265
- 432 22. Sarfo F, Treiber F, Gebregziabher M et al. PINGS (Phone-Based Intervention  
433 Under Nurse Guidance After Stroke). *Stroke*. 2018;49(1):236-239.  
434 doi:10.1161/strokeaha.117.019591
- 435 23. Le Danseur M. Stroke Rehabilitation. *Critical Care Nursing Clinics of North*  
436 *America*. 2020;32(1):97-108. doi:10.1016/j.cnc.2019.11.004
- 437 24. Clarke DJ. Nursing practice in stroke rehabilitation: systematic review and meta-  
438 ethnography. *Journal of Clinical Nursing*. 2013;23(9):1201-1226.  
439 doi:10.1111/jocn.12334
- 440 25. Vaughn S, Mauk KL, Jacelon CS, Larsen PD, Rye J, Wintersgill W, Cave CE,  
441 Dufresne D. The Competency Model for Professional Rehabilitation  
442 Nursing. *Rehabilitation Nursing*. 2016;41(1):33-44. doi:10.1002/rnj.225
- 443 26. Bjartmarz I, Jónsdóttir H, Hafsteinsdóttir TB. Implementation and feasibility of  
444 the stroke nursing guideline in the care of patients with stroke: a mixed methods  
445 study. *BMC Nursing*. 2017;16(1). doi:10.1186/s12912-017-0262-y
- 446 27. Winstein CJ, Stein J, Arena R, et al. Guidelines for Adult Stroke Rehabilitation  
447 and Recovery: A Guideline for Healthcare Professionals From the American

- 448 Heart Association/American Stroke Association. *Stroke*. 2016;47(6):e98-e169.  
449 doi:10.1161/STR.000000000000098
- 450 28. Das Nair R, Lincoln N. Cognitive rehabilitation for memory deficits following  
451 stroke. *Cochrane Database of Systematic Reviews*. 2007.  
452 doi:10.1002/14651858.cd002293.pub2
- 453 29. Cappa, S.F. *et al.* (2005) “EFNS guidelines on Cognitive Rehabilitation: Report of  
454 an EFNS task force,” *European Journal of Neurology*, 12(9), pp. 665–680.  
455 Available at: <https://doi.org/10.1111/j.1468-1331.2005.01330.x>.
- 456 30. Gladstone, D.J., Danells, C.J. and Black, S.E. (2002) “The fugl-meyer assessment  
457 of motor recovery after stroke: A critical review of its measurement properties,”  
458 *Neurorehabilitation and Neural Repair*, 16(3), pp. 232–240. Available at:  
459 <https://doi.org/10.1177/154596802401105171>.
- 460 31. Hughes AK, Cummings CE. Grief and Loss Associated With Stroke Recovery: A  
461 Qualitative Study of Stroke Survivors and Their Spousal Caregivers. *Journal of*  
462 *Patient Experience*. 2020;7(6):237437352096779.  
463 doi:10.1177/2374373520967796
- 464 32. Lui SK, Nguyen MH. Elderly Stroke Rehabilitation: Overcoming the  
465 Complications and Its Associated Challenges. *Current Gerontology and*  
466 *Geriatrics Research*. 2018;2018:1-9. doi:10.1155/2018/9853837
- 467 33. Eldridge SM, Chan CL, Campbell MJ, Bond CM, Hopewell S, Thabane L, *et al.*  
468 Consort 2010 statement: Extension to randomised pilot and feasibility trials.  
469 *BMJ*. 2016;;i5239.



- 470 34. Sarfo FS, Adusei N, Ampofo M, Kpeme FK, Ovbiagele B. Pilot trial of a tele-rehab  
471 intervention to improve outcomes after stroke in Ghana: A feasibility and user  
472 satisfaction study. *Journal of the Neurological Sciences*. 2018;387:94-97.  
473 doi:10.1016/j.jns.2018.01.039
- 474 35. Jones F, Partridge C, Reid F. The Stroke Self-Efficacy Questionnaire: measuring  
475 individual confidence in functional performance after stroke. *Journal of Clinical*  
476 *Nursing*. 2008;17(7):244-252. doi:10.1111/j.1365-2702.2008.02333.x
- 477 36. Deon PH, Makhoul MP, Pacheco Loss B, Da Silva Jaques E, De Souza Urbanetto  
478 J, Gemerasca Mestriner R, Torriani-Pasin C. The Stroke Self-Efficacy  
479 Questionnaire Brazil (SSEQ-B): a structural validity analysis. *Topics in Stroke*  
480 *Rehabilitation*. 2022:1-9. doi:10.1080/10749357.2022.2095084
- 481 37. Jones, Fiona, Cecily Partridge, and Fiona Reid. "The Stroke Self-Efficacy  
482 Questionnaire: measuring individual confidence in functional performance after  
483 stroke." *Journal of clinical nursing* 17.7b (2008): 244-252.
- 484 38. Julious, S.A. (2005) "Sample size of 12 per group rule of thumb for a pilot study,"  
485 *Pharmaceutical Statistics*, 4(4), pp. 287–291. Available at:  
486 <https://doi.org/10.1002/pst.185>.
- 487 39. Sealed Envelope Ltd. 2022. Create a blocked randomisation list. [Online]  
488 Available from: <https://www.sealedenvelope.com/simple-randomiser/v1/lists>
- 489 40. Bengtsson, M. (2016) "How to plan and perform a qualitative study using content  
490 analysis," *NursingPlus Open*, 2, pp. 8–14. Available at:  
491 <https://doi.org/10.1016/j.npls.2016.01.001>.

492 41. Langhorne P, Bernhardt J, Kwakkel G. Stroke rehabilitation. The Lancet. 2011  
493 May 14;377(9778):1693-702

494

495 **Appendices**

496 **S1 Fig.** Fig 1 Enrolment, interventions and assessment schedule

497 **S2 Fig.** Fig 2. Workflow Chart

498 **S3 Table.** Table 1: Details of Intervention

499 **S4 File. File 1** Ethical Clearance

500 **S5 File. File 2** SPIRIT Checklist

501 **S6 File . File 3** CONSORT Checklist

502 **S7 File. File 4** Protocol Approved by NIMR-IRB
